# Supplementary material
Source: PubMed Central journal article supplement (PMC9712246)
Supplement: NIHMS1843916-supplement-Figure_S2.pdf [file NIHMS1843916-supplement-Figure_S2.pdf]

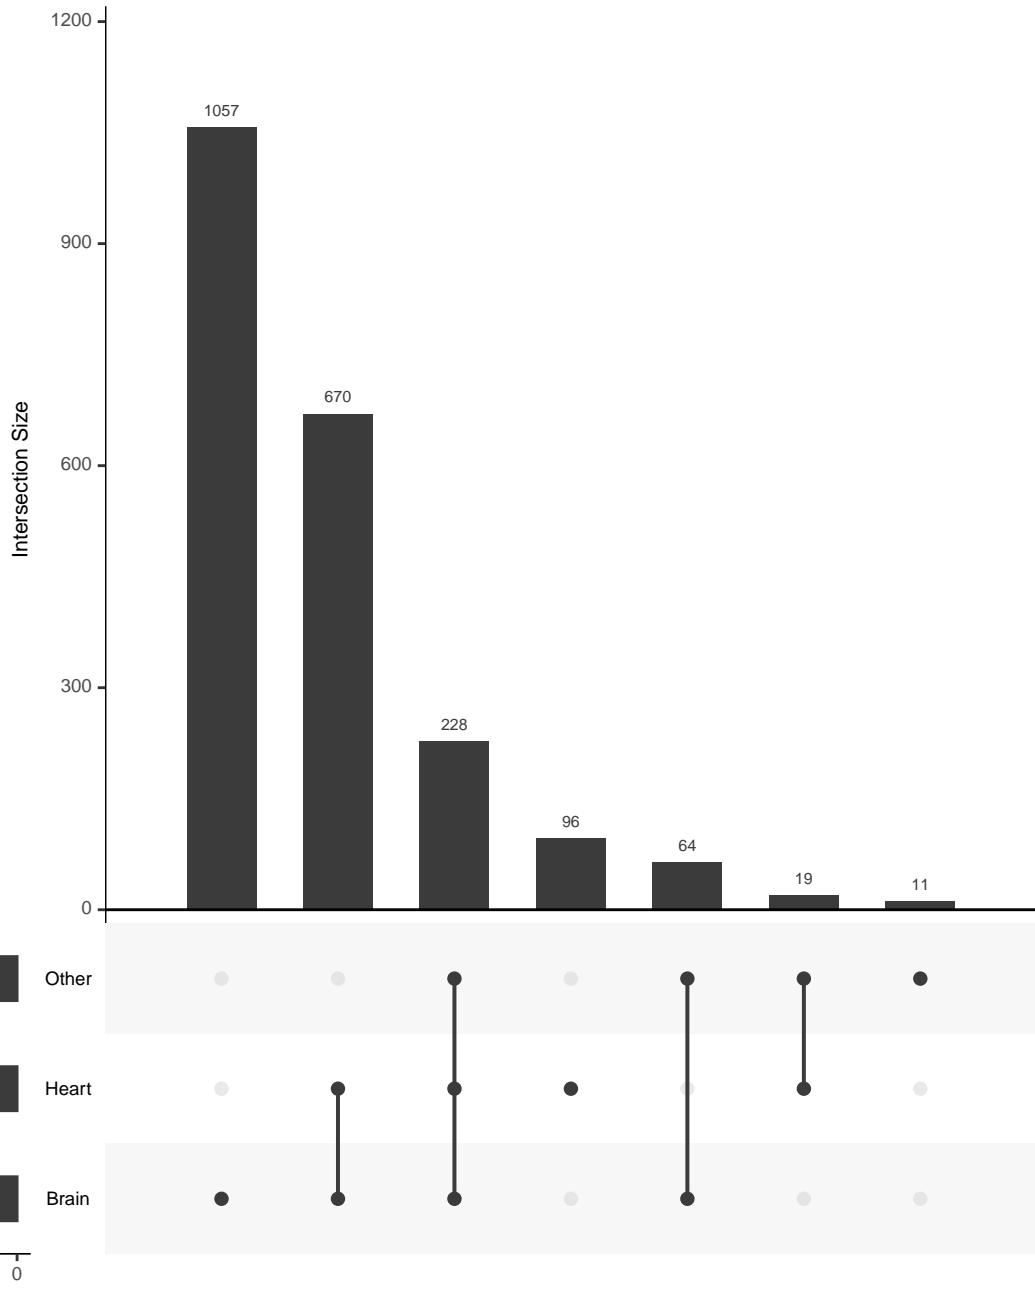

2000 1500 1000 500 0  
Set Size
