# Supplementary material
Source: PubMed Central journal article supplement (PMC9712246)

Allele

● Chimpanzee ● Human

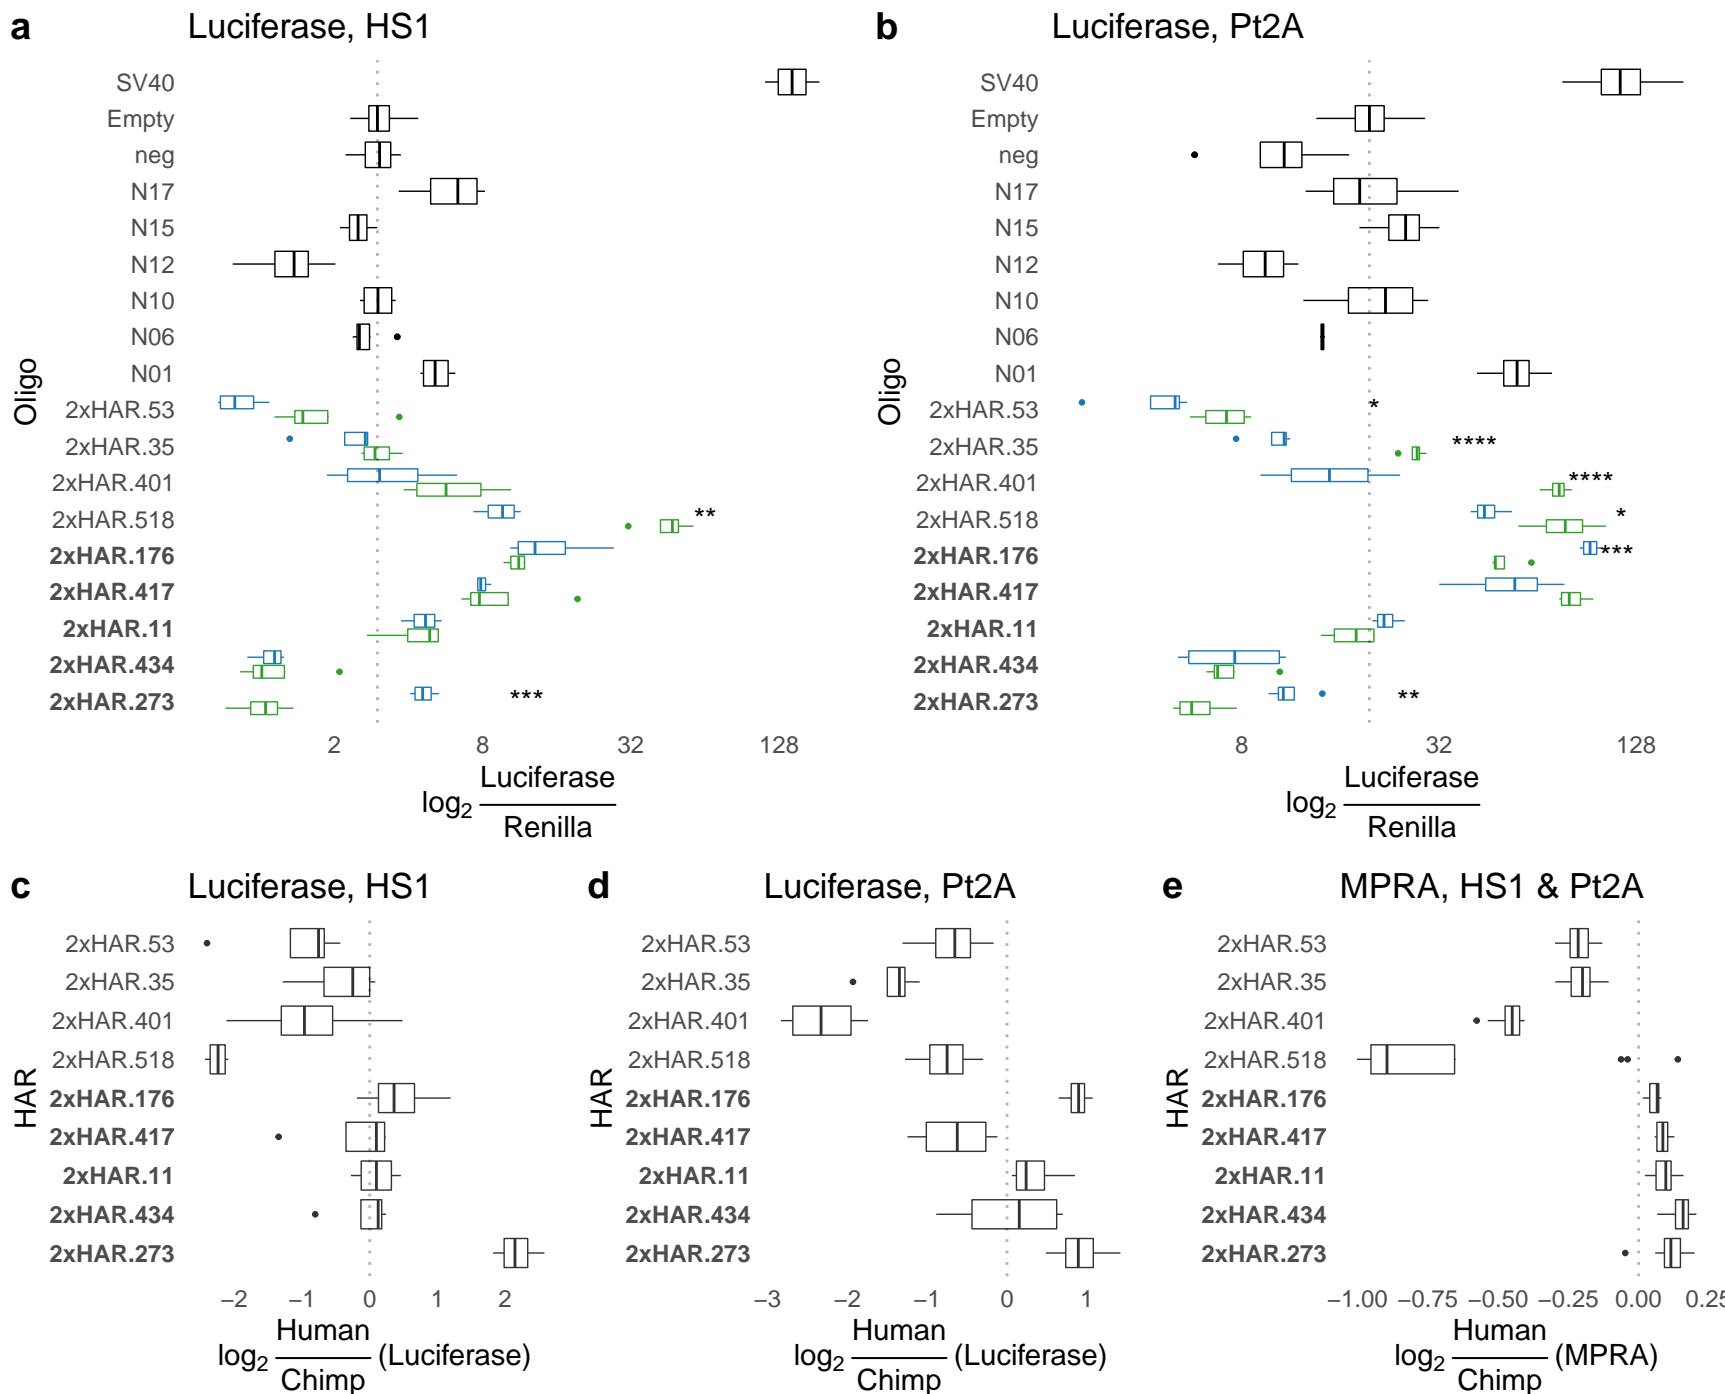

Supplement: NIHMS1843916-supplement-Figure_S6.pdf [file NIHMS1843916-supplement-Figure_S6.pdf]
