# Supplementary material
Source: PubMed Central journal article supplement (PMC9712246)

Concordance ● MPRA high, ML low ● MPRA low, ML high

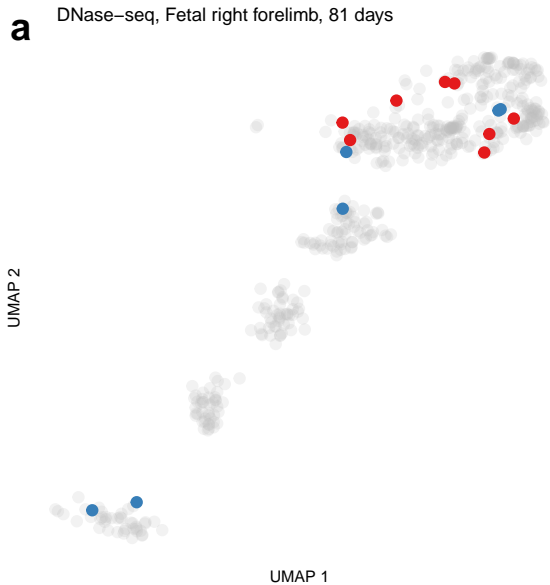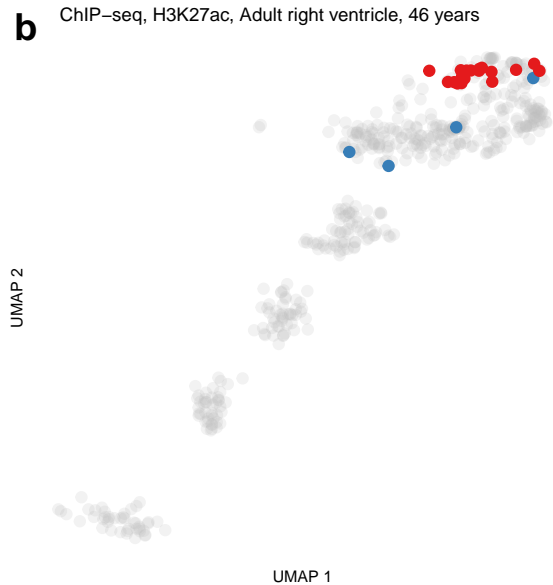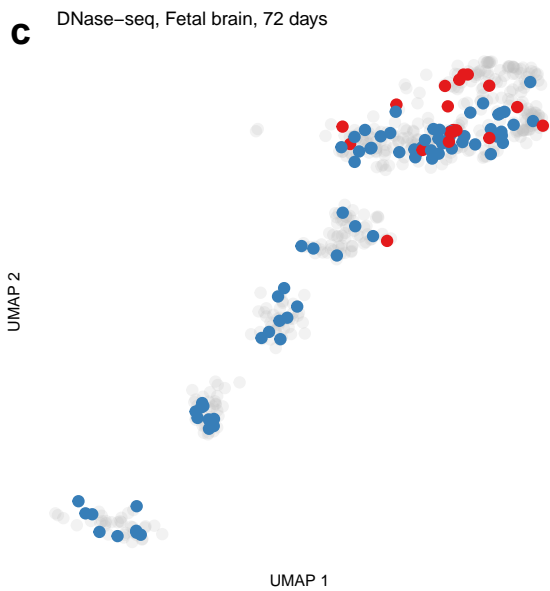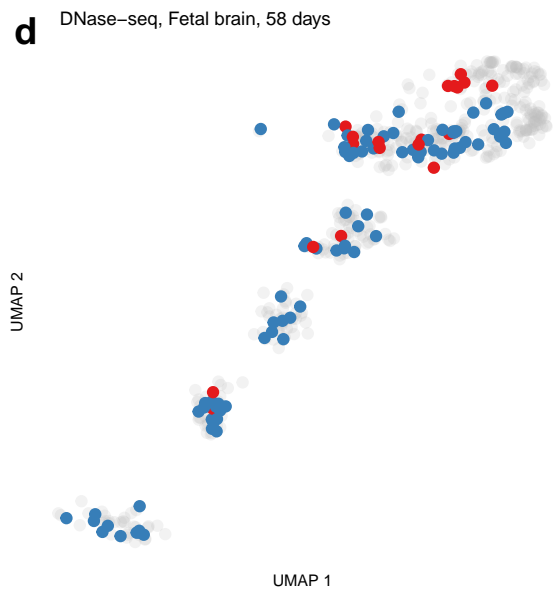

Supplement: NIHMS1843916-supplement-Figure_S8.pdf [file NIHMS1843916-supplement-Figure_S8.pdf]
