# Supplementary material
Source: PubMed Central journal article supplement (PMC9712246)

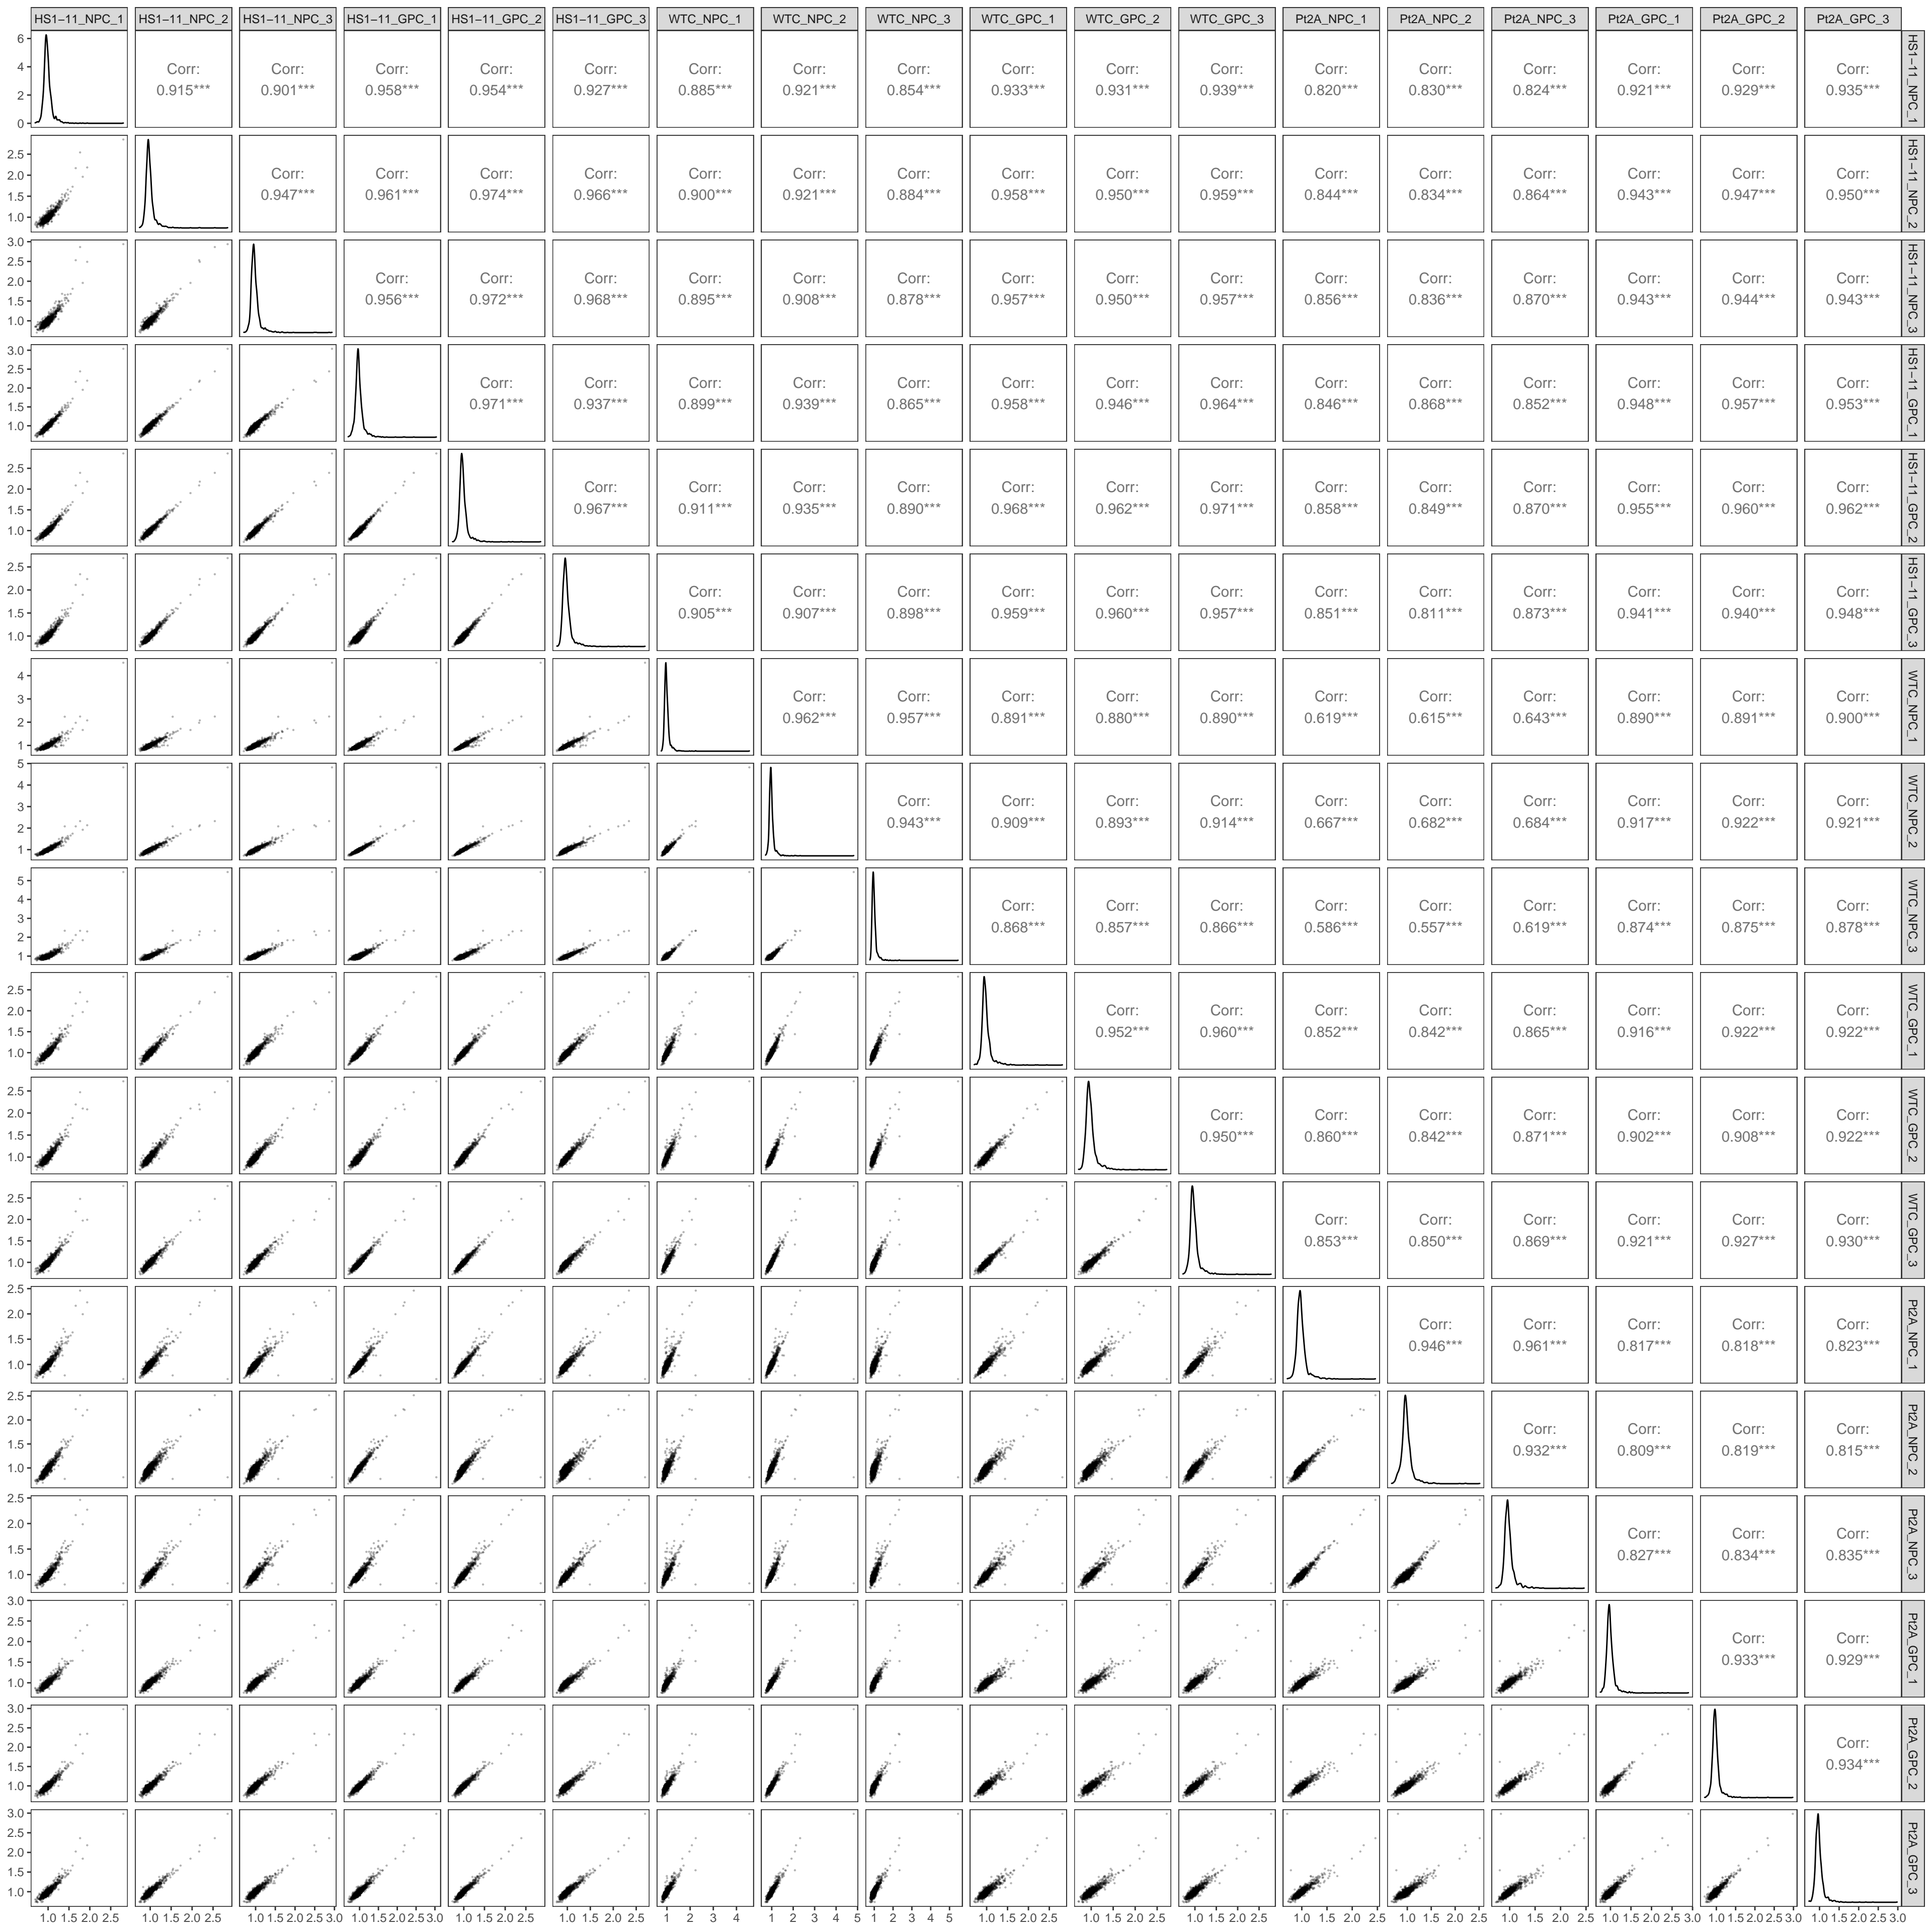

Supplement: NIHMS1843916-supplement-Figure_S9.pdf [file NIHMS1843916-supplement-Figure_S9.pdf]
