# Supplementary material
Source: PubMed Central journal article supplement (PMC9712246)
Supplement: NIHMS1843916-supplement-Figure_S11.pdf [file NIHMS1843916-supplement-Figure_S11.pdf]

Intersection Size

150  
100  
50  
0

144  
34  
14  
7  
6  
6  
5  
4  
3  
3  
3  
2  
2  
1  
1  
1  
1  
1  
1  
1

- loops\_gwas
- loops\_qtl
- ld\_block\_gwas
- ld\_block\_qtl
- loops\_pc\_genes
- domain\_pc\_genes

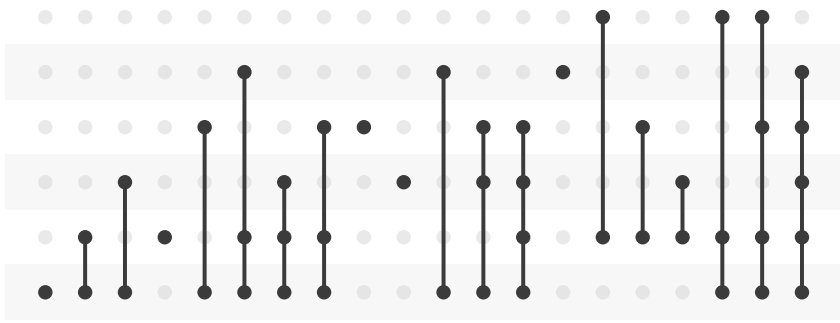

200 150 100 50 0

Set Size
