# Supplementary material
Source: PubMed Central journal article supplement (PMC9712246)

**A**

2xHAR.164 Permutations  
MPRA Activity & Brain Enhancer State Change

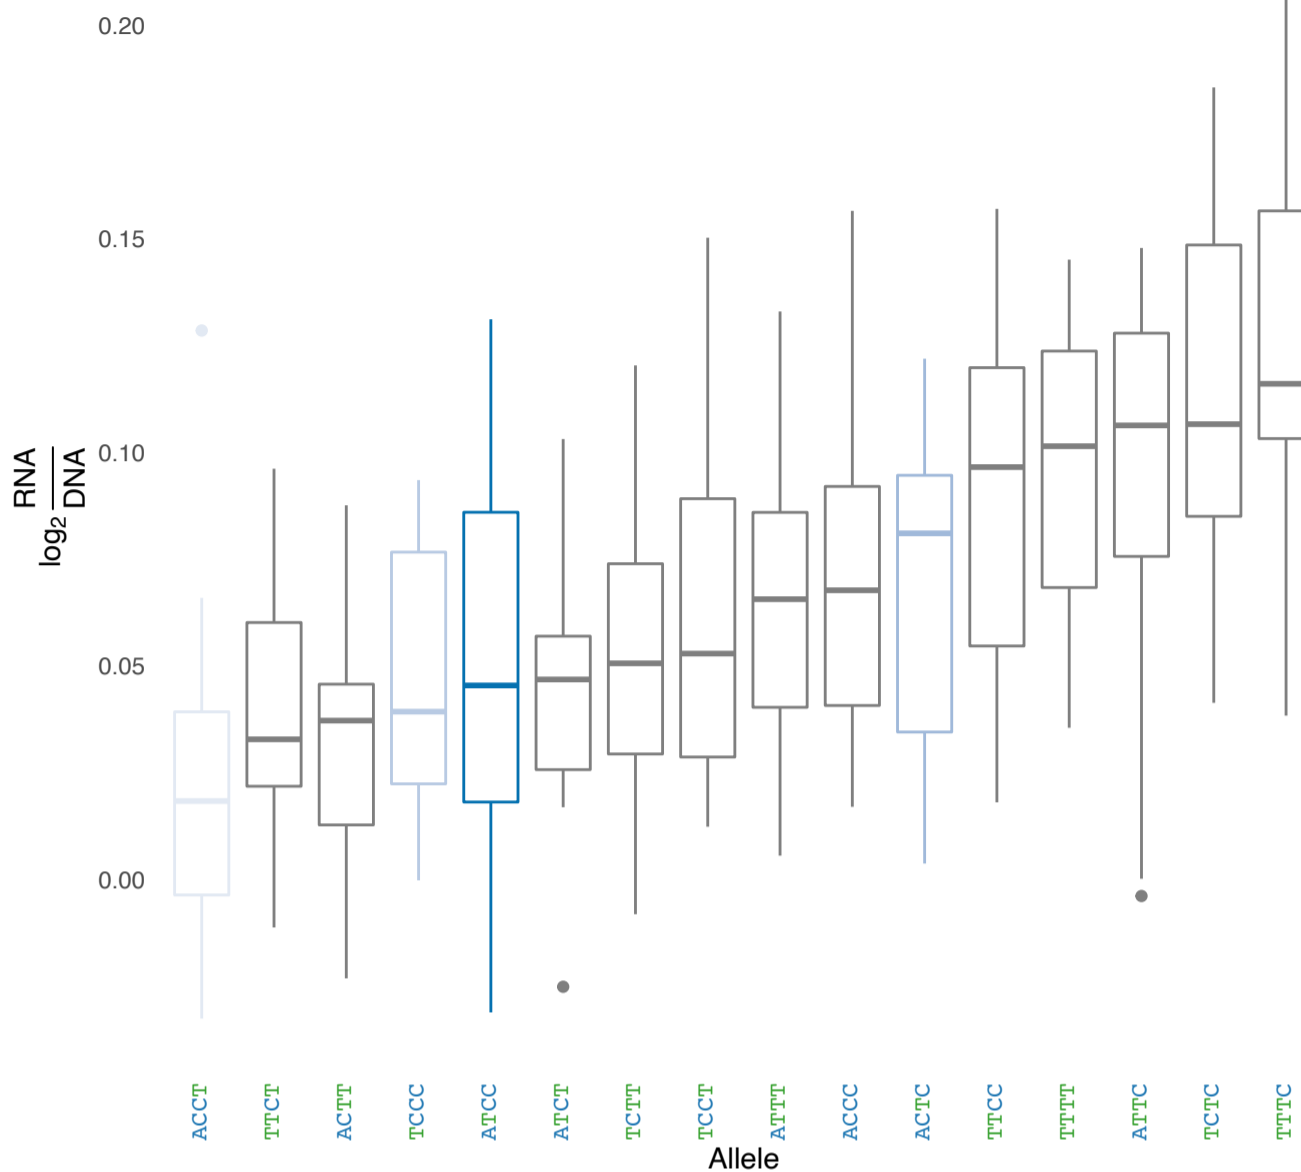**B**

2xHAR.238 Permutations  
MPRA Activity & Brain Enhancer State Change

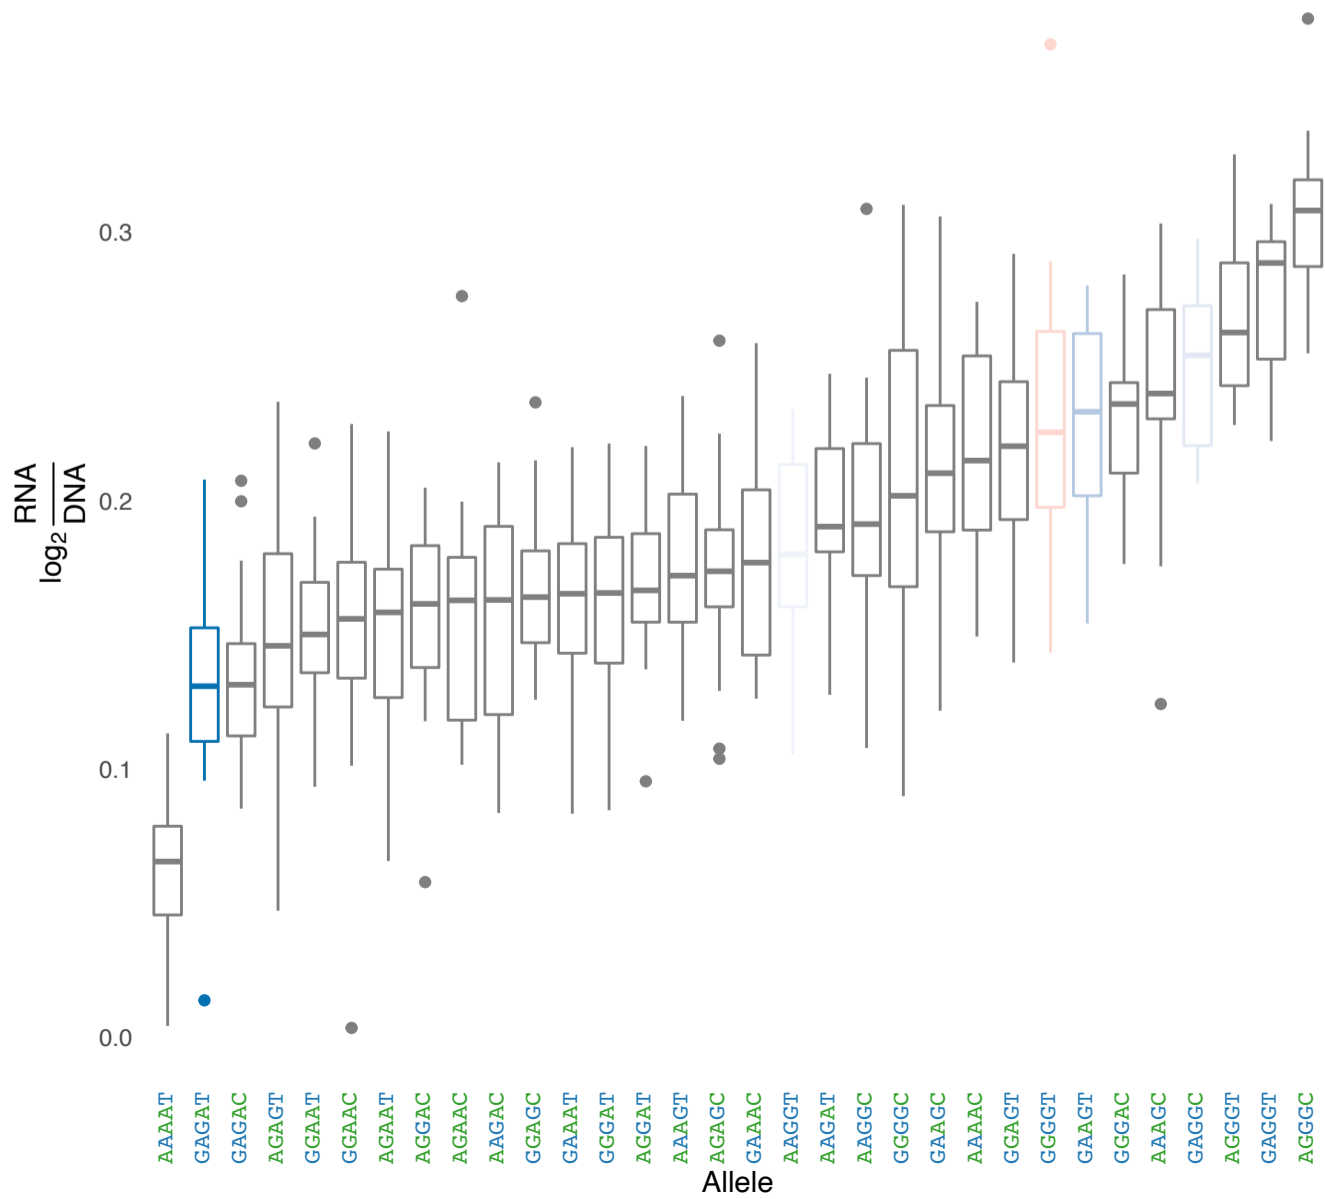

Supplement: NIHMS1843916-supplement-Figure_S12.pdf [file NIHMS1843916-supplement-Figure_S12.pdf]
