# Supplementary material
Source: PubMed Central journal article supplement (PMC9712246)

# Distribution of Oligo Count per HAR

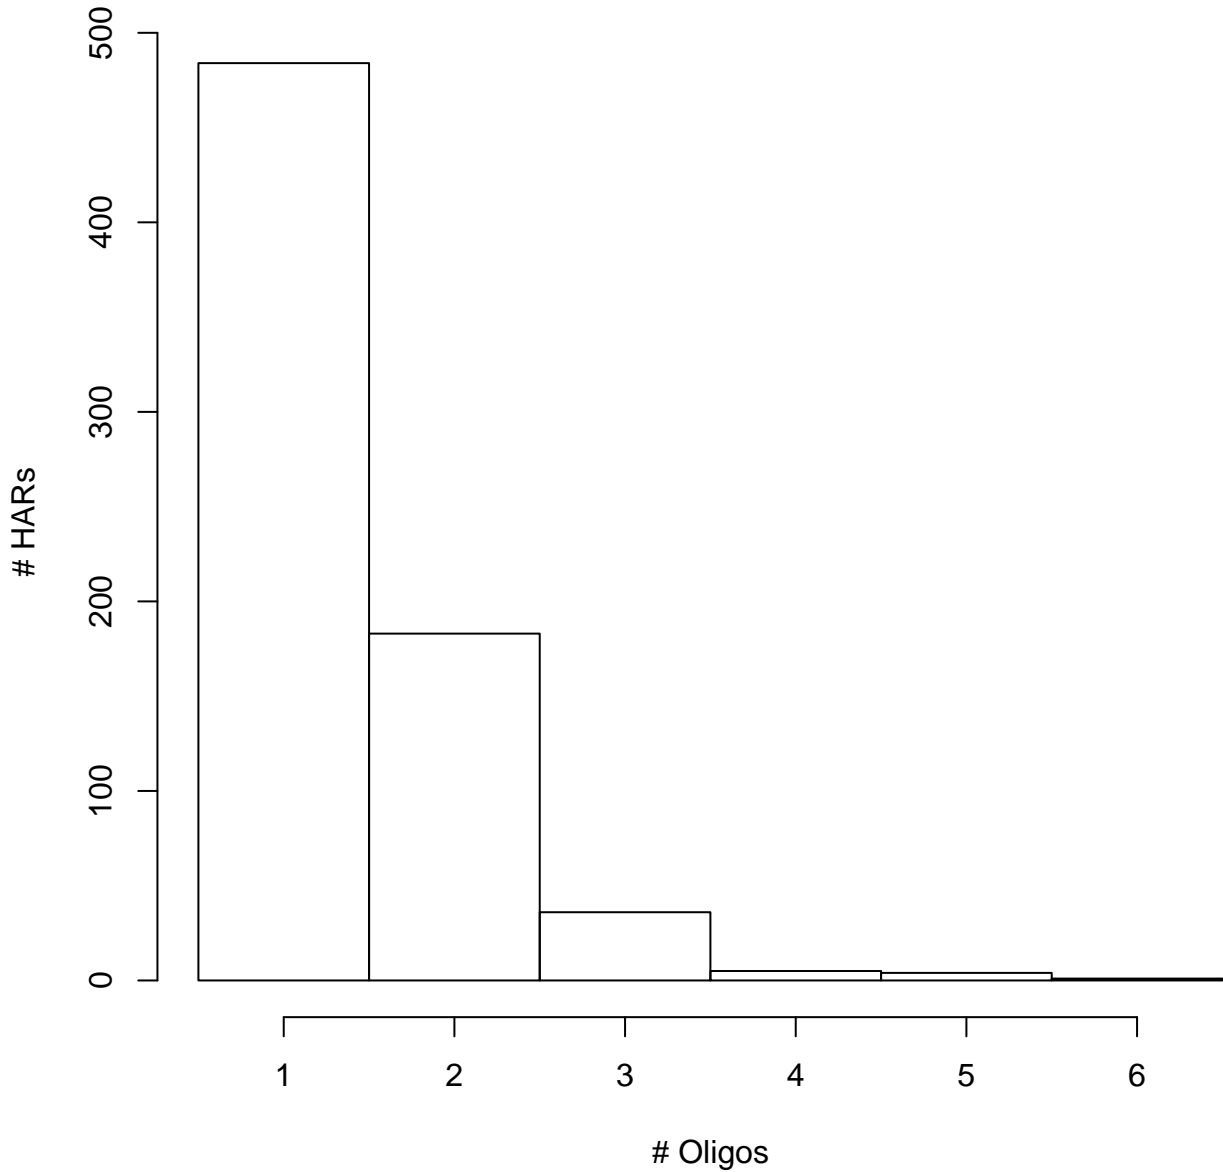

Supplement: NIHMS1843916-supplement-Figure_S14.pdf [file NIHMS1843916-supplement-Figure_S14.pdf]
